# Supplementary material for: Efficacy of Community-Based Exercise Therapy Among African American Patients With Peripheral Artery Disease: A Randomized Clinical Trial
Source: PubMed Central journal article supplement (PMC6484888; doi:10.1001/jamanetworkopen.2018.7959), 2019-02-15
Supplement: jamanetwopen-2-e187959-s001.pdf [file jamanetwopen-2-e187959-s001.pdf]

1           **Promoting Walking in African Americans with Peripheral Arterial Disease**  
2                           **Principal Investigator: Tracie Collins, MD**  
3                           **Protocol Version: 6.0, October 2012**

4  
5   **PURPOSE**

6 By doing this study, we will determine if motivational interviewing improves lower limb  
7 function in persons with poor leg circulation.

8  
9   **1. BACKGROUND**

10  
11 African Americans (AAs) are more than two times as likely as non-Hispanic whites to  
12 suffer from peripheral arterial disease (PAD) – atherosclerosis of the abdominal aorta  
13 and arteries of the lower extremities. Further, AAs with PAD suffer with greater walking  
14 impairment (defined as a reduction in walking distance, speed, and/or stair climbing)  
15 and more severe disease as compared to non-Hispanic whites. These identified  
16 disparities are largely attributed to lower levels of physical activity in AAs. Effective  
17 management of PAD among AAs is critically needed, particularly early in the course of  
18 the disease before the onset of severe morbidity (e.g., lower extremity amputation).  
19 Home-based walking is a potentially excellent therapy for PAD, but the patient must be  
20 motivated to walk. Because of low levels of physical activity, AAs with PAD have a  
21 particularly high need for motivational strategies to promote home-based walking.

22  
23 Motivational interviewing is an effective counseling method in individuals who are less  
24 ready to change their behavior (i.e., low motivation). Thus, motivational interviewing is  
25 an ideal counseling method to promote home-based walking among AAs with PAD. In  
26 our pilot study to promote home-based walking, we used a counseling protocol, Patient-  
27 centered Assessment and Counseling for Exercise (PACE)<sup>1</sup> which targets known  
28 modifiable determinants of behavior change (e.g., social support). Using PACE, we  
29 demonstrated an improvement in stair climbing ability and lower limb blood flow (as  
30 measured by the ankle-brachial index). Improvements in these lower limb outcomes  
31 offer support for the use of PACE counseling in PAD, but PACE does not specifically  
32 address low motivation – a critical target for AAs with PAD. In addition, PACE is not  
33 culturally sensitive. In our proposed trial, we hypothesize that motivational interviewing  
34 will improve walking distance and reduce walking impairment more than PACE in AAs  
35 with PAD.

36  
37 There is a critical need to improve lower limb outcomes in AAs with PAD. Our long-term  
38 goal is to reduce debilitating functional limitations and amputations in AAs with PAD.  
39 The overall objective of this application is to determine the most effective counseling  
40 strategy to improve home-based walking in AAs with PAD. We have robust pilot data to  
41 support the study hypotheses and ensure successful completion of the study.

42  
43 We will deliver the PACE protocol or MI for 6 months, using both face-to-face visits and  
44 telephone contact. Our primary outcome is walking distance (as measured by the widely  
45 used and well-validated 6-minute walk test) at the end of active intervention (6 months).  
46 Secondary outcomes are walking distance as measured beyond the active phase of  
47 intervention (12 months), use of home-based walking (as measured by accelerometry),

48 and lower limb blood flow (as measured by the ankle brachial index - ABI). Our  
49 comparison group will receive the same print material as the two interventions as well  
50 as contact every three months to update any changes in contact information and to  
51 assess their health status. We will randomize 204 participants to one of three arms:  
52 Control (Tx1); PACE (Tx2); or MI (Tx3). In addition, we will determine the efficacy of  
53 PACE (Tx2) to increase walking distance in AAs with PAD, compared to Control (Tx1).

54

55 Primary Hypothesis:

56 1. At 6 months, AAs with PAD randomized to MI (Tx3) will have a greater increase in  
57 their walking distance, compared to those receiving PACE (Tx2) and the control group  
58 (Tx1).

59

60 Secondary Hypotheses:

61 1. AAs with PAD randomized to MI (Tx3) will have a greater increase in their walking  
62 distance at 12 months – a follow-up period beyond the six months of active intervention  
63 – compared to those receiving PACE (Tx2) and compared to the control group (Tx1).

64 2. At 6 and 12 months, AAs with PAD randomized to MI (Tx3) will have a greater  
65 increase in their home-based walking and their lower limb blood flow, compared to  
66 those receiving PACE (Tx2) and to the control group (Tx1).

67 3. At 6 and 12 months, AAs with PAD randomized to PACE (Tx2) will have a greater  
68 increase in their walking distance compared to those randomized to control (Tx1).

69

70 Exploratory Aim:

71 We will explore potential mediators (self-efficacy, social support, intrinsic/extrinsic  
72 motivation) and moderators (co-morbidities, leg symptom type, stage of change) of  
73 intervention effects on walking distance, home-based walking, and lower limb blood flow  
74 among AAs with PAD.

75

## 76 **2. METHODS**

77

78 Research Study Design:

79 We will conduct a 12-month, 3-arm randomized trial to determine the benefits of the 6-  
80 month long MI intervention –and culturally sensitive print material – in African  
81 Americans with PAD.

82

### 83 *Pilot Study*

84 The principal investigator was a faculty member at the University of Minnesota in Year 1  
85 of the study. The pilot study was completed in Year 1. The pilot study served to assist  
86 the study team with recruitment strategies and to further develop the culturally sensitive  
87 print material. During the first year of the project, staff created and worked  
88 collaboratively with the Scientific Advisory Board and the Community Advisory Board to  
89 evaluate and advise regarding the components and delivery of the intervention and to  
90 prepare for the intervention clinical trial.

91

### 92 *Clinical Trial*

93 Year 2 – 5 will include the full trial, data analysis, and completion of initial manuscripts.  
94 Below, the study flow is outlined.

95 Step 1. Telephone Screening

96 For the initial step to assess eligibility, research staff will conduct a telephone screen of  
97 each potential participant. During the telephone interview, study staff will review the  
98 exclusion checklist and administer the Physical Activity Readiness Questionnaire (PAR-  
99 Q). The research staff will also gather contact information, demographics, and any co-  
100 morbidities (e.g. arthritis, COPD, asthma, angina, diabetes, and hypertension).

- 101 • The PAR-Q, developed by Canadian exercise experts, is a valid and proven tool  
102 for screening individuals prior to initiation of physical activity. The questionnaire  
103 detects relevant problems that may require further evaluation by a physician prior  
104 to starting any form of exercise.
- 105 • Patient-centered Assessment and Counseling for Exercise (PACE) assessment  
106 protocol will be used to identify persons who are in the Stage of Action (score in  
107 the range of 5 to 8). As noted in the exclusion criteria and given our focus on  
108 sedentary persons, we will exclude persons at such high levels of activity.

109  
110 Step 2. In-Person Screening Examination

111 To determine if a participant has PAD, study staff will perform an ankle brachial index  
112 (ABI; a sensitive measure to diagnose PAD) and administer the Short Physical  
113 Performance Battery (SPPB) during the initial in-person visit. If the participant has PAD,  
114 he/she will complete a treadmill test. Each participant will also receive a culturally  
115 sensitive handbook for managing PAD and a pedometer.

116  
117 The ABI may be done during mass screening events such as public health fairs or  
118 events at churches. Consent to join the study will not be obtained at these events. The  
119 test will be explained to anyone who approaches the booth and their verbal agreement  
120 to have the test done will be considered consent. If the results of the ABI test indicate  
121 the individual qualifies for the study, the study will be explained to them. If they are  
122 interested in joining the study, they will be asked to schedule an appointment to come in  
123 for the SPPB. Full study informed consent will be obtained at that visit.

124  
125 There may also be situations where a potential participant contacts the study team with  
126 an interest in joining the study but cannot easily leave their home. In this event, the  
127 study team will go to the participant's home and perform the ABI test and the SPPB. A  
128 screening consent form has been developed for this situation. The study team will  
129 review this one page document with the potential participant and they will be asked to  
130 sign before any study activities are performed. If the participant passes this stage of  
131 screening and wishes to continue into the study, travel arrangements will be made for  
132 them to come in for the treadmill test.

- 133  
134 • Ankle-Brachial Index (ABI): Eligibility and Secondary Outcome: A participant will  
135 rest for 5 minutes and a 5 or 8 MHz hand-held Doppler will be used to measure  
136 systolic blood pressures in both brachial arteries and in both ankles (i.e., the  
137 dorsalis pedis and posterior tibial arteries). The resting ABI will be calculated  
138 based on the ratio of the ankle and arm pressures. For each leg, the ankle  
139 pressure will be the higher of the dorsalis pedis and posterior tibial artery systolic  
140 blood pressures. The arm pressure will be the higher of the right and left brachial  
141 systolic pressures. The leg with the lowest ABI will be the determining cut-point

142 for defining disease. The ABI will be assessed at baseline and again at the 12-  
143 month follow-up visit. We will provide baseline training (10 hours) to all study  
144 staff, and refresher training every 6 months. Random fidelity checks of the staff  
145 will be performed by Dr. Collins.

146 • Short Physical Performance Battery (SPPB): This assessment is a powerful  
147 predictor of disability and mobility. The patient will be asked to do a series of  
148 timed-functional tasks. They will first be asked to attempt three balance tests,  
149 starting with their feet together (side by side) for 10 seconds. Then they will be  
150 asked to do semi-tandem stand (heel of one foot placed by the big toe of the  
151 other foot which they may put either foot in front, whichever is more comfortable  
152 for them) for 10 seconds. Final test is tandem stand (heel of one foot in front of  
153 and touching the toes of the other foot) for 10 seconds. If participant is unable to  
154 hold the position for each of the balance tests for 10 seconds, record result and  
155 move to gait speed test. For the gait speed test, the participant will be asked to  
156 walk 13 feet and one half inch at their usual speed, just as if they were walking  
157 down the street to go to the store. Lastly, the participant will be asked to fold their  
158 arms across their chest and sit, so that their feet are on the floor then stand up  
159 keeping their arms folded across their chest. If the participant is able to complete  
160 the initial chair stand, they will be asked to complete five continuous chair stands  
161 without using their arms. All of the functional tests are timed and scored based  
162 on the time. If the SPPB is not performed in the home as indicated above, the  
163 participants will complete this testing at KUMC-Wichita. Participants will be given  
164 parking directions and a map to indicate where this appointment will be held.

165 • Submaximal Exercise Treadmill Test: Clinical Safety to Engage in a Walking  
166 Program: PAD is a marker for atherosclerosis in other vascular beds, most  
167 notably the coronary arteries. Although many patients do not have significant  
168 coronary artery disease limiting daily activities, it is imperative to identify  
169 individuals who may experience exercise-induced coronary ischemic symptoms,  
170 or clinically silent exercise-induced ST depression > 2.0 mm, for whom study  
171 inclusion would be contraindicated. We will conduct a symptom-limited exercise  
172 test also known as a sub-maximal test. We will use an exercise treadmill test  
173 with 12-lead electrocardiographic monitoring and measurement of blood  
174 pressure. This graded exercise treadmill test requires a constant treadmill speed  
175 with modest increases in grade every few minutes. Specifically, the treadmill test  
176 will begin at 2 mph per participant's comfort level. The speed of the treadmill test  
177 may be reduced to no less than 1.5 mph. The incline increase will be a 2%  
178 increase of incline every 2 minutes. For participant's recovery, return to baseline  
179 vitals is the goal with a maximum time of 20 minutes. Following a demonstration  
180 by study staff, the patient will walk on a treadmill to maximal walking distance.  
181 During testing, patients will rate leg discomfort and rate of perceived exertion.  
182 Leg discomfort will be based on a scale of 1 to 4: 0=no pain, 1=onset of pain,  
183 2=mild pain, 3=moderate pain, and 4=severe pain. Rate of perceived exertion will  
184 be based on the Borg scale. For the purposes of the study, the participant will be  
185 excluded if they cannot walk for a minimum of two minutes or if they have a Short  
186 Physical Performance Battery score of 11 or higher. If a participant is unable to  
187 complete two minutes on the treadmill on their first try, they will be asked to come  
188 back once to try the test again. This treadmill test will take place at a separate

189 visit from the ABI and SPPB. Participants will be asked to come to Heartland  
190 Cardiology for this testing which will be overseen by a Cardiologist and/or  
191 Exercise Physiologist. Again, participants will be given parking directions and a  
192 map to indicate where to go for this appointment.  
193

### 194 Step 3: Enrollment/Randomization Visit

195 During the enrollment visit, scheduled within 2 weeks of the screening visit (Step 2),  
196 patients will complete the baseline 6-minute walk test, baseline blood draw, blood  
197 pressure, height, weight, complete all questionnaires (Barriers Self Efficacy, CHAMPS  
198 activities questionnaire for Older Adults, Fruit &Vegetable Intake, Fat Intake, Exercise  
199 Self-Efficacy, Lifestyle and Clinical Survey, San Diego Claudication Questionnaire, The  
200 SF-12 Health Survey, Social Support and Exercise Survey, Supplemental questions,  
201 Treatment Self-Regulation Questionnaire, VascQOL, and Walking Impairment  
202 Questionnaire), and undergo randomization.  
203

### 204 Outcome Measures/Dependent Variables (Table 1):

- 205 • Primary Outcome Assessment: 6-Minute Walk Test  
206 The 6-minute walk test is the most widely accepted and objective measure of  
207 walking distance. In contrast to treadmill testing, it provides information on  
208 patients' ability to walk in the community, thus it is a useful measure of the  
209 functional outcomes of our behavioral intervention to promote home-based  
210 walking. The test is conducted by placing two cones 50 feet apart in a marked  
211 hallway and instructing patients to walk as many laps around the cones as  
212 possible. Patients are permitted to stop walking during the test, but recording of  
213 time will continue during the rest period. We will record time and distance to  
214 onset of leg discomfort, rate of perceived exertion at baseline, minute 2, minute 4  
215 and post-test, total distance walked (feet). In a prior study involving 64 patients  
216 with PAD, the reliability coefficient for distance during 6-minute walk tests  
217 performed one week apart was 0.94 with a coefficient of variation of 11.7%<sup>2</sup>.  
218 • Secondary Outcome: Accelerometry-Measured Home-Based Walking:  
219 For patients who have met eligibility criteria, we will distribute an Actigraph  
220 accelerometer MODEL GT3XE (ActiGraph, Pensacola, FL) to objectively  
221 measure total physical activity and bouts of home-based walking. It uses an  
222 internal vertical plane accelerometer to measure both movement and intensity.  
223 The analog acceleration signal is processed by an analog-to-digital converter,  
224 producing a unit-less "count" value proportional to the number of movements  
225 (similar to the number of steps from a pedometer) and the velocity of those  
226 movements. The user specifies the time interval over which these values will be  
227 summed (10-second intervals for this study). Count values are stored in the  
228 ActiGraph's internal memory and uploaded to a computer for processing. The  
229 ActiGraph is lightweight, small, and worn on the waist, so it will detect whole-  
230 body movement and functions particularly well with walking activity. At the  
231 screening visit and at months 6 and 12, we will distribute accelerometers and a  
232 return envelope. Participants in all study arms will wear the ActiGraph monitor  
233 for 7 days at each of these three time points. Initially distributing the  
234 accelerometer at treadmill test session will allow for collection of accelerometer  
235 data prior to randomization.

236 By using a custom-developed program<sup>3</sup>, ActiGraph data will be reduced to  
237 several summary variables excluding bouts of at least 60 minutes of continuous  
238 zeros indicative of times the monitor was not worn. At least three days of data  
239 will be needed to be included in the data set and all days with at least 10 hours of  
240 data. First, we will calculate average counts per day across all days. Second, we  
241 will classify ActiGraph counts into intensity categories of sedentary, light, and  
242 walking activity using individually determined ActiGraph count cutoffs based on  
243 count values obtained during the baseline 6-minute walk test. Because PAD  
244 patients have limited functional ability, we will not calculate a count cutoff  
245 distinguishing true moderate (3-5.9 times resting metabolic rate; 3-5.9 METs) or  
246 vigorous intensity physical activity (6 times resting metabolic rate; equivalent to a  
247 5 mph jog). We will use individual-level cutoffs for this population since no  
248 cutoffs have yet been established for older adults with limited mobility. The  
249 individual cutoff approach has been supported for use in older adults and for  
250 intervention research. To determine sedentary and walking intensity count  
251 cutoffs, ActiGraphs will be set to record data in 10-second intervals. The cutoff  
252 between sedentary and light activity will be determined by having the subject sit  
253 quietly in a comfortable chair; the cutoff between light and walking intensity  
254 activity will be determined from the average count values obtained by asking the  
255 participant to walk for 3 minutes at their normal walking pace. The start and finish  
256 time will be recorded. We will use the shorter time interval (10 seconds vs. 1  
257 minute) due to the intermittent nature of PAD patients' walking. Times when the  
258 patient is resting will not be used for calculation of count cutoffs.

- 259 • Quality of Life (QOL): The SF-12 and VascQOL questionnaires:  
260 The SF-12 is a shorter version of the SF-36 and has been validated in older AAs.  
261 It assesses general QOL. The VascQOL is disease specific and assess how  
262 each person has been affected by the poor circulation in their legs over the past  
263 two weeks.
- 264 • Supplemental Questions:  
265 There are six additional questions that ask about decision making behavior,  
266 unfairness, and the participant's insight on his/her standing in the community  
267 (i.e., self-perception).

268  
269  
270  
271  
272  
273  
274  
275

**Table 1. Measures**

| Variables                                               | Measure                                                                                             | Description and Data Source                | Data Collection Timepoints |          |           | Dependent Variable | Potential Moderator | Potential Mediator |
|---------------------------------------------------------|-----------------------------------------------------------------------------------------------------|--------------------------------------------|----------------------------|----------|-----------|--------------------|---------------------|--------------------|
|                                                         |                                                                                                     |                                            | Baseline                   | 6 Months | 12 Months |                    |                     |                    |
| <b>Outcomes</b>                                         |                                                                                                     |                                            |                            |          |           |                    |                     |                    |
| Walking Distance                                        | Six minute walking test                                                                             | Objective measure of walking distance      | X                          | X        | X         | X                  |                     |                    |
| Home-Based Walking                                      | Accelerometry                                                                                       | Objective measure of walking adherence     | X                          | X        | X         | X                  |                     |                    |
| Lower Limb Blood Flow                                   | Ankle Brachial Index*                                                                               | Objective measure of lower limb blood flow | X                          |          | X         | X                  |                     |                    |
| <b>Patient Variables</b>                                |                                                                                                     |                                            |                            |          |           |                    |                     |                    |
| Sociodemographics, Co-existing illnesses, Social habits | Lifestyle and Clinical Survey                                                                       | Survey                                     | X                          |          |           |                    | X                   |                    |
| Physical Activity                                       | Community health Activities Model Program for Seniors (CHAMPS) Questionnaire                        | Survey                                     | X                          | X        | X         |                    | X                   |                    |
| Stage of Change                                         | PACE Score                                                                                          | Survey                                     | X                          | X        | X         |                    | X                   |                    |
| Leg Symptoms                                            | San Diego Claudication Questionnaire                                                                | Leg Symptom Categories; Survey             | X                          | X        | X         |                    | X                   |                    |
| Risk Factor Control                                     | Laboratory data; blood pressure measurements; self-report of smoking cessation                      | Blood draws; Survey                        | X                          | X        | X         |                    | X                   |                    |
| <b>Psychosocial Factors</b>                             |                                                                                                     | Survey                                     |                            |          |           |                    |                     |                    |
| Self-efficacy                                           | Barriers Self Efficacy and Exercise Self Efficacy                                                   | Surveys                                    | X                          | X        | X         |                    |                     | X                  |
| Social Support                                          | Social Support Questionnaires : Friend Support for Exercise Scale Family Support for Exercise Scale | Surveys                                    | X                          | X        | X         |                    |                     | X                  |
| <b>Cognitive Factors</b>                                |                                                                                                     |                                            |                            |          |           |                    |                     |                    |
| Intrinsic Motivation                                    | Treatment Self-Regulation Questionnaire (TSRQ).                                                     | Survey                                     | X                          | X        | X         |                    |                     | X                  |

\* Following recommendation from the Scientific Advisory Board in year 1, the ankle- brachial index will only measure at baseline and 12 months

277  
278  
279  
280  
281  
282  
283  
284  
285

**Potential Mediators**

- **Self-Efficacy for Exercise: Barriers Self-Efficacy and Exercise Self-Efficacy:**  
We will utilize two measures to assess barriers to self-efficacy. The Barriers Self-Efficacy Scale, a 13-item measure, was designed to assess participants' perceived capabilities to exercise three times per week over the next 2 months while facing common barriers. Participants indicate their degree of confidence for

286 each item on a 0-100% scale. Internal consistency of this measure is high ( $\alpha$   
287 =0.92). The Exercise Self-Efficacy measure, composed of 8 items, captures a  
288 participant's efficacy for continued exercise participation (i.e., at least three times  
289 per week for 40 minutes) over incremental week periods for 8 weeks. The  
290 internal consistency of this measure is also high ( $\alpha$  =0.92). The confidence  
291 scores from the above measures will be summed and divided by the total number  
292 of items giving a possible range of 0-100%. These two measures will be  
293 combined to provide a summary score of overall exercise efficacy.

- Social Support:

295 The Social Support for Exercise Scale<sup>4</sup> contains 13 items describing a supportive  
296 behavior and assessing the extent to which friends and family demonstrate this  
297 support using a 5-point Likert scale (ranging from 1=none to 5=very often). This  
298 scale then is used to derive two subscales, one describing family support and  
299 one describing support from friends. This scale has been shown to demonstrate  
300 sufficient construct validity and reliability<sup>4</sup>. Criterion-related validity has also been  
301 reported in that social support for PA has been significantly associated with  
302 actual PA ( $r$  =.23 to  $r$  =.46)<sup>4</sup>.

- Intrinsic-Extrinsic Motivation:

304 Intrinsic motivation is a key concept in our theoretical model and it will be  
305 assessed with the Treatment Self-Regulation Questionnaire (TSRQ). The 15-  
306 item measure yields two main subscales of reasons why a respondent might  
307 either begin or maintain exercise: a) Intrinsic (Autonomous) Motivation, and b)  
308 Extrinsic (Controlled) Motivation.

#### 309 Potential Moderators

- Co-morbidities/Symptomatology:

312 ○ We will use the Lifestyle and Clinical Survey (LCS) to obtain  
313 sociodemographic (e.g., age) and comorbidity data. Dr. Collins originally  
314 developed the LCS to obtain pertinent past medical history and  
315 sociodemographic information, which could then be adjusted for in risk  
316 factor assessments for PAD within a cohort study. The survey was  
317 interviewer-administered to 30 patients and required no longer than 15  
318 minutes to complete. Reliability evidence was excellent, with a summary  
319 kappa statistic of 0.81 (95% CI 0.78, 0.84). Validity evidence was very  
320 good, with a summary kappa statistic of 0.58 (95% CI 0.52, 0.64).

321 ○ The San Diego Claudication Questionnaire (SDCQ), an expansion of the  
322 original World Health Organization/Rose Questionnaire, is a 9-item  
323 questionnaire for categorizing leg symptoms (no pain, atypical leg pain,  
324 intermittent claudication). The SDCQ asks about pain in either calf, thigh,  
325 or buttock on walking, whether the pain is present at rest, whether it ever  
326 disappears during walking, and whether the pain is relieved within 10  
327 minutes or less upon stopping. It takes approximately 5 minutes to  
328 complete. Leg symptom subtypes will be analyzed as potential  
329 moderators.

330 ○ We will determine atherosclerotic risk factor control. For smoking habits,  
331 we will ascertain current and past smoking habits. For glucose and lipid  
332 control, we will complete blood draws for glycosylated hemoglobin and



333 lipid profiles (fasting). For blood pressure control, we will obtain three  
334 serial blood pressure measurements, each separated by 2 minutes. The  
335 results will be averaged.

336 ○ We will use the Community Healthy Activities Model Program for Seniors  
337 (CHAMPS) Questionnaire to assess physical activity. We will administer  
338 the 42-item questionnaire, designed for use among older persons, at  
339 baseline, 6, and 12 months to all three groups to assess frequency and  
340 duration of various physical activities typically undertaken by adults.  
341 Among a sample with a mean age of 74 years, 6-month stability of this  
342 instrument ranged from 0.58- 0.67, using intraclass correlation  
343 coefficients. All measures were sensitive to change with a  $P < 0.01$ . This  
344 questionnaire was validated for use in African Americans.

345 • Fruit & Vegetable Intake and Fat Intake:

346 These two intakes will be used to assess dietary habits. The Fruit & Vegetable  
347 Intake asks participants to recall their servings of specific fruits and vegetables  
348 over the last week. The Fat Intake asks participants to recall specific foods that  
349 they have eaten over the past month. Both intakes will be assessed at baseline,  
350 6-months, and 12-months.

351 • Walking Impairment Questionnaire (WIQ):

352 The WIQ is a disease-specific questionnaire validated in patients with PAD. It  
353 consists of four subcategories: pain, distance, walking speed, and stair climbing.  
354 WIQ will be assessed at baseline, 6-months, and 12-months.

355 • Stage of Change:

356 The Patient-Centered Assessment and Counseling for Exercise (PACE) score  
357 will be used to identify a participant's stage of readiness for exercise. To obtain a  
358 PACE score, a participant chooses one of eight graded statements that best  
359 describe his/her current level of and interest in physical activity. This score  
360 determines the "Stage of Change" that they are in<sup>5</sup>.

361

362 PACE and MI interventions:

363 Both interventions will consist of nine sessions that occur between randomization and  
364 the 6-month follow-up. There will be four in-person and five telephone sessions with a  
365 trained counselor. The MI and PACE sessions will be audio-taped and they may also be  
366 videotaped for fidelity purposes.

367

368 Patient-Centered Assessment and Counseling for Exercise (PACE):

369 PACE is a program based on the "stages of change" model and is designed to increase  
370 social support and self-efficacy, reduce perceived barriers to activity, and increase  
371 awareness of the benefits of activity. PACE requires participants to complete an  
372 assessment of their willingness to change. Based on their score, the participant  
373 receives a stage-matched protocol (Getting Out of Your Chair, Planning the First Step,  
374 or Keeping the PACE) to partially complete before seeing the counselor. During the  
375 counseling session, participant and counselor review the protocol and discuss stage-  
376 relevant information. The goals and discussion are follow-up up on at the next  
377 counseling session.

378

379 Motivational Interviewing (MI):

380 MI is a directive, client-centered counseling approach to elicit behavior change by  
381 assisting clients in exploring and resolving ambivalence. MI is best suited for persons  
382 who exhibit lower intrinsic motivation and readiness for behavior change. Within the  
383 philosophy behind MI, client resistance is often a behavior evoked by environmental  
384 conditions and is not necessarily indicative of intrinsic motivation to change. Thus, the  
385 counselor will engage the client in exploring resistance or ambivalence rather than  
386 combat it. The five main components of MI are: evocation, collaboration, autonomy,  
387 direction, and empathy. The counselors proactively try to evoke the client's own reasons  
388 for change and ideas about how change should happen. The counselor will also use  
389 collaboration as part of the MI sessions by encouraging power sharing in their  
390 interaction where the client's ideas will set the tone of the session. Another key  
391 component of MI is autonomy. Counselors are trained to elicit comments from the client  
392 that lead to a greater perceived choice regarding the target behavior (walking). MI is  
393 not only used for physical activity, but any behavior change with a targeted direction. It  
394 is important for the MI counselors to direct the client toward the target behavior. The  
395 counselor keeps the sessions on topic and does not allow the client to wander from the  
396 target behavior. The final key component of MI is empathy. The counselor will  
397 demonstrate a genuine understanding for what the client says and where they are  
398 coming from. The ultimate goal is to explore the individual's feelings about his or her  
399 walking without pressuring for behavior change. As previously mentioned, the MI  
400 sessions will be audio-taped. Random sessions will be coded by a trained MI instructor,  
401 in order to ensure validity among all MI counselors.

402

403 Control Arm:

404 In addition to the baseline, 6-month, and 12-month assessments, the control arm will  
405 only receive phone calls at months three and nine. The purpose of these phone calls is  
406 to get a general health update and to thank them for their participation in the study.

407

408 Follow-up:

409 We will assess all patients during in-person visits at 6- and 12 months. During the  
410 follow-up in-person visits, participants will be asked to complete the 6-minute walk test,  
411 a blood draw (lipid panel, A1C, and 60 ccs for stored blood), blood pressure, height,  
412 weight, and all questionnaires except the Lifestyle and Clinical Survey (LCS), which is a  
413 medical history questionnaire intended for use only at baseline. We will also capture  
414 accelerometer data during each follow-up visit. At 6- and 12 months, we will give  
415 patients the accelerometer and an envelope to mail it back to our study team. The  
416 morning after the 6- and 12-month follow-up assessments, we will call the patient with a  
417 reminder to wear the device. They will be called again on days 3 and 7 to answer  
418 questions. ABI will be re-assessed at the 12 month follow-up.

419

420 Inclusion Criteria

- 421 1. African American (determined by self-report)
- 422 2. Lived most of their life in the United States
- 423 3. Resting ABI < 0.995 – to assess for PAD
- 424 4. English speaking
- 425 5. Has a telephone – required for delivery of the intervention

426

427 Exclusion Criteria

- 428 1. Currently walking for exercise at least 5 days per week (i.e., a PACE score ranging  
429 from 5-8); the rationale is that a person who is currently walking for at least 5 days  
430 per week is already sufficiently active and therefore not a member of the target  
431 population for our motivational home-based walking intervention.
- 432 2. Prior major amputation (foot or lower leg) or critical leg ischemia (tissue loss,  
433 gangrene, or ulcers)
- 434 3. Rest pain with ABI <0.4 and non-palpable femoral pulses without prior evaluation by  
435 a vascular surgeon, given the need for evaluation for the role of more invasive  
436 therapy prior to recommending walking therapy
- 437 4. Leg revascularization within 3 months of enrollment or plans for revascularization  
438 during the study period; the rationale is that post intervention recovery and potential  
439 complications are likely to limit the patient's ability to adhere to the study protocol.
- 440 5. Use of supplemental oxygen; the rationale for this is concern for participant safety  
441 and potential limited ability to participate in the study secondary to breathing  
442 difficulty.
- 443 6. Myocardial infarction within the preceding 3 months; the rationale for this is  
444 participant safety and the potential risk for complications and/or the need for  
445 supervised cardiac rehabilitation following the event.
- 446 7. Resting blood pressure > 200/110 mmHg; the rationale for this is participant safety,  
447 as blood pressure may further increase during exercise and increase risk for a  
448 cerebrovascular event or myocardial infarction.
- 449 8. Exercise-induced coronary ischemic symptoms, or exercise-induced ST depression  
450 > 2.0 mm; the rationale for this is participant safety and the need for further cardiac  
451 evaluation prior to involvement in walking therapy<sup>6</sup>.
- 452 9. Inability to walk for 2 minutes; the rationale being that people who cannot walk for 2  
453 minutes would not be able to complete the necessary submaximal treadmill test,  
454 which is used to screen for coronary ischemic symptoms. We will also exclude  
455 anyone who can walk for 20 minutes or more during the submaximal treadmill test.  
456 Anyone who can complete the submaximal test would not have significant walking  
457 impairment and would not get that much out of the study. Short Physical  
458 Performance Battery score of 11 or higher as such persons do not have a clinically  
459 significant impairment in mobility; therefore, we will exclude anyone who scores a  
460 11 or higher (out of a maximum of 12 points).

461

462 Recruitment Strategies

463 We will post flyers and brochures at local sites, including clinics, senior centers and  
464 churches within Wichita. We will obtain permission from appropriate leaders prior to  
465 posting or displaying any material. Letters will be sent to local physicians and church  
466 and community center leaders notifying them of the study and asking for referrals. A  
467 mass mailing postcard will also be sent out. In addition, we will use local newspaper and  
468 radio advertisements. The study will also be advertised on the KUSM-W facebook page,  
469 through a broadcast email that goes to KU faculty, students and staff, and in the  
470 Jayhawk Talk Online publication. All advertisements have been developed with the KU  
471 Public Affairs Office and will be submitted for IRB review.

472

473 The study team will attend local and regional health fairs and other community events in  
474 an effort to recruit participants. The ABI screening will be performed at these events.

475  
476 Retention Strategies

477 A variety of items will be given or mailed to participants to keep them informed and  
478 engaged in the study. Participants and their physicians will receive letters updating them  
479 on the lab results and treadmill results that are obtained as part of study procedures.  
480 Participants will also receive Thank you and Birthday postcards throughout the study as  
481 applicable. In addition, participants will be given study brochures and handouts with  
482 PAD and study specific information and a card with important phone numbers.

483  
484 Informed Consent Process

485 Participants will call in response to advertisements or physician referrals. Verbal  
486 consent will be obtained from study staff for the phone screening and for the ABI done  
487 as part of mass screening events. Written consent will be obtained by study staff when  
488 the participants come to the initial in-person screening. If the participant is seen in their  
489 home for the ABI and SPPB, they will first sign the screening consent form and if they  
490 qualify for the study, they will sign the full study consent before completing the treadmill  
491 test. Participants will have an opportunity to review the consent form and ask questions  
492 prior to signing. Participants will not be coerced into signing but they will be notified that  
493 participation in the study cannot proceed without a signed consent form.

494  
495 Sample Size Justification

496 Sample size and power calculations used the common sample size formula for normally  
497 distributed statistics with a type I error level of  $\alpha$  (2-sided test) and type II error of  $\beta$ :

498 
$$n = \frac{V * (z_{1-\alpha/2} + z_{1-\beta})^2}{\Delta^2}$$

499 where  $\Delta$  denotes the minimal meaningful difference to detect and V denotes the  
500 variance of the test statistic. For the ANCOVA analyses,  $V=2*\sigma^2(1-\rho^2)$  where  $\sigma^2$  is the  
501 (average) variability of the 6-minute walking distance at baseline and follow-up and  $\rho$  is  
502 the (average) correlation between baseline and follow-up measurements.<sup>136</sup> The  
503 estimates for the sample size required in each arm are presented in Table 2 across a  
504 range of possible values for the correlation. These are based on a clinically meaningful  
505 difference to detect of one half of a city block (40 meters) and using a Bonferroni  
506 correction for the multiple comparisons, i.e.,  $\alpha$  was taken as 0.025. An estimate for the  
507 standard deviation was taken as approximately 88, which is based on the variability  
508 observed in a study reporting changes over 6 months in a similar population with PAD  
509 (Gardner 2001).<sup>24</sup>

510  
511  
512 **Table 2. Sample size in each arm for desired power with corresponding**  
513 **correlation between measurements**

|           | Correlation |      |      |      |      |      |
|-----------|-------------|------|------|------|------|------|
|           | 0.60        | 0.65 | 0.70 | 0.75 | 0.80 | 0.85 |
| 80% Power | 59.1        | 53.4 | 47.1 | 40.4 | 33.3 | 25.6 |

|             |       |      |      |      |      |      |
|-------------|-------|------|------|------|------|------|
| 90% Power   | 77.2  | 69.7 | 61.5 | 52.8 | 43.4 | 33.5 |
| 97.5% Power | 109.8 | 99.1 | 87.5 | 75.1 | 61.8 | 47.6 |

514  
515 Based on a correlation of 0.75, we will have 92% power for each of the primary  
516 hypotheses with 57 patients in each arm having complete follow-up. If the correlation is  
517 as low as 0.65, we will have 83% power. While the calculations above assume  
518 homoscedasticity, this is for sample size and power estimation purposes. Analyses will  
519 use robust variance estimation for confidence intervals and P-values. Supportive  
520 analyses adjusting for potential imbalances in baseline variables between treatment  
521 groups will also be considered for added precision. General feasibility for adaptation to  
522 standard clinical practice will be evaluated by considering both an estimate of  
523 effectiveness, taking into account the level of counseling interaction received, as well as  
524 an estimate of efficacy for the planned frequency and duration of patient interaction.  
525 Attrition will be a potential limitation to the interpretation and generalizability of results.  
526 The planned enrollment of 204 is inflated to balance potential attrition. We expect to be  
527 able to hold attrition to no more than 15%. However, if we observe a rate as high as  
528 20% we will still have 91% power with a correlation of 0.75 and 80% power with a less  
529 optimistic correlation of 0.65. Thus, in the event that we observe both a lower  
530 correlation and 33% higher attrition than expected, this study will still have 80% power  
531 to detect the outcome of interest. Extensive efforts to minimize the amount of missing  
532 data are summarized in section D5. Despite our best efforts, some missing data is likely  
533 to be unavoidable. If the missingness is missing completely at random, the  
534 consequence will merely be lost precision. If the data are missing at random,  
535 conditioned on measured covariates, then supplementary analyses adjusting for these  
536 covariates will produce unbiased results. For missing data mechanisms beyond  
537 measured covariates, we will examine the extent to which results may be affected.  
538 Multiple imputation will also be considered for missing data issues.

### 540 3. BENEFITS AND RISKS OF RESEARCH

#### 541 Known and Anticipated Risk

542 We will use counseling strategies (i.e., stage of readiness to change approach or  
543 motivational interviewing techniques) and survey data for our interventions and data  
544 collection, respectively. Our counseling strategies have been used in prior studies  
545 without harm to participants but there could be unforeseen anxiety that arises from  
546 receipt of these strategies or with completing survey questions. We will be very  
547 cognizant of participant perceptions of counseling techniques and/or survey questions in  
548 an effort to attenuate any anxiety related to our study protocols.

550  
551 Potential additional risks to participants:

- 552 • Unforeseen anxiety from discovering they have atherosclerosis in one or more  
553 vessels of their body.
- 554 • Increased fatigue from the use of routine exercise. This fatigue will subside as  
555 they become more accustomed to exercising.
- 556 • Increased leg pain from the use of routine exercise.

- 557       • Having blood drawn may lead to soreness at the site or the development of a  
558       bruise. The risk from this blood draw is the same as the risk as when blood is  
559       removed for routine laboratory work.  
560

561       Anticipated Benefit

562       The potential benefits to subjects in either Tx2 or Tx3 are an increase on physical  
563       activity and reduction of walking impairment from PAD. There are no expected benefits  
564       for the control group.  
565

566  
567  
568

569       **4. MONITORING AND DISCONTINUATION**

570  
571       Plan for Monitoring and Reporting Unanticipated Problems

572       We designed the screening criteria with great care and consideration in order to exclude  
573       those participants who could not safely engage in a walking study. Throughout the study  
574       we will actively screen for adverse events every three months. We will also have an  
575       adverse event hotline that participants can call at any time. The statistician will regularly  
576       pull reports to look for patterns of adverse events. The PI will review events that require  
577       more immediate attention to determine the appropriate care and reporting. A Data  
578       Safety Monitoring Board (DSMB) will meet every six months. However, the frequency  
579       may vary depending on participant enrollment and frequency and severity of adverse  
580       events. Any adverse events will be reported to the local IRB and the DSMB  
581       simultaneously. A follow-up report will be submitted to the IRB to further clarify if the  
582       event has been determined related to the study by the DSMB.  
583

584       Study Withdrawal/Discontinuation Procedures

585       During the consenting process, participants will be informed that, at any time, they can  
586       withdraw from the study.  
587

588       **5. PLAN FOR ASSURING PARTICIPANTS' PRIVACY AND CONFIDENTIALITY,**  
589       **FOLLOW-UP and RECORD RETENTION ISSUES**

590  
591       Confidentiality

592       The data will be entered and stored on a password-protected computer at KUSM-W,  
593       secured under lock and key with access restricted to research personnel only. In  
594       addition, HSC2 and government and regulatory bodies will have access, as required by  
595       law.  
596

597       Privacy

598       The consent interview will be conducted in private to protect the conservation from  
599       being heard by others.  
600

601       All study participants will be randomly assigned a study number. This number will not  
602       be associated with any identifying participant characteristics such as date of birth, social  
603       security number or medical record number. Any identifying participant information and

604 their assigned study number will be kept as a separate list that will be maintained in a  
605 secure location. No data forms will contain any specific participant identifiers. All data  
606 collected will be evaluated and analyzed only as group data and no specific participants  
607 will be identified in presentation or publication of study results. Once the study is  
608 completed and all manuscripts have been accepted, the master list will be destroyed  
609 and all computer files of the participant master list will be deleted.

610

## 611 **References**

612

- 613 1. Patrick K, Sallis J, Long B, Calfas K, Wooten W, Heath G. A new tool for  
614 encouraging activity: Project PACE. 22 ed. 1994. p. 45-52.  
615
- 616 2. Montgomery PS, Gardner AW. The clinical utility of a six-minute walk test in  
617 peripheral arterial occlusive disease patients. 46 ed. 1998. p. 706-11  
618
- 619 3. Sirard JR, Riner WF, Jr., McIver KL, Pate RR. Physical activity and active  
620 commuting to elementary school. *Med Sci Sports Exerc* 2005 Dec;37(12):2062-9.  
621
- 622 4. Sallis JF, Grossman RM, Pinski RB, Patterson TL, Nader PR. The development  
623 of scales to measure social support for diet and exercise behaviors. *Prev Med*  
624 1987 Nov;16(6):825-36.  
625
- 626 5. Prochaska JO, DiClemente CC. Stages and processes of self-change of  
627 smoking: toward an integrative model of change. *J Consult Clin Psychol* 1983  
628 Jun;51(3):390-5.  
629
- 630 6. Hirsch AT, Haskal ZJ, Hertzler NR, Bakal CW, Creager MA, Halperin JL, et al.  
631 ACC/AHA 2005 Practice Guidelines for the management of patients with  
632 peripheral arterial disease (lower extremity, renal, mesenteric, and abdominal  
633 aortic): a collaborative report from the American Association for Vascular  
634 Surgery/Society for Vascular Surgery, Society for Cardiovascular Angiography  
635 and Interventions, Society for Vascular Medicine and Biology, Society of  
636 Interventional Radiology, and the ACC/AHA Task Force on Practice Guidelines  
637 (Writing Committee to Develop Guidelines for the Management of Patients With  
638 Peripheral Arterial Disease): endorsed by the American Association of  
639 Cardiovascular and Pulmonary Rehabilitation; National Heart, Lung, and Blood  
640 Institute; Society for Vascular Nursing; TransAtlantic Inter-Society Consensus;  
641 and Vascular Disease Foundation. *Circulation* 2006 Mar 21;113(11):e463-e654.
