# Supplementary material for: Efficacy of Community-Based Exercise Therapy Among African American Patients With Peripheral Artery Disease: A Randomized Clinical Trial
Source: PubMed Central journal article supplement (PMC6484888; doi:10.1001/jamanetworkopen.2018.7959), 2019-02-15
Supplement: jamanetwopen-2-e187959-s002.pdf [file jamanetwopen-2-e187959-s002.pdf]

## Supplementary Online Content

Collins TC, Lu L, Ahluwalia JS, et al. Efficacy of community-based exercise therapy among African American patients with peripheral artery disease: a randomized clinical trial. *JAMA Network Open*. 2019;2(2):e187959. doi:10.1001/jamanetworkopen.2018.7959

**eTable.** Twelve-Month Change in Study Outcomes

This supplementary material has been provided by the authors to give readers additional information about their work.

© 2019 Collins TC et al. *JAMA Network Open*.

**eTable.** Twelve-Month Change in Study Outcomes

| Outcome Measures                                  | Mean (SE)    |                    | Change (95% CI)              |                                  |         |                             |         |
|---------------------------------------------------|--------------|--------------------|------------------------------|----------------------------------|---------|-----------------------------|---------|
|                                                   | Baseline     | 12-Month Follow-up | 12-Month Within-Group Change | 12-Month With-Control Comparison | p-value | 12-Month With-MI Comparison | p-value |
| <b>6-min Walking Distance <sup>a</sup></b>        |              |                    |                              |                                  |         |                             |         |
| MI                                                | 366.72(9.65) | 358.98(9.82)       | -7.75(-18.54 to 3.05)        | -5.56<br>(-21.18 to 10.06)       | 0.49    | 0 (Reference)               | NA      |
| PACE                                              | 350.15(9.35) | 363.90(10.99)      | 13.75(1.69 to 25.80)         | 14.24<br>(-1.85 to 30.34)        | 0.08    | 19.80<br>(3.33 to 36.28)    | 0.02*   |
| Control                                           | 355.85(9.21) | 354.78(9.86)       | -1.08(-12.31 to 10.16)       | 0 (Reference)                    | NA      | NA                          | NA      |
| <b>SF-12 <sup>b</sup> Mental health T-score</b>   |              |                    |                              |                                  |         |                             |         |
| MI                                                | 52.11 (1.23) | 51.78 (1.31)       | -0.33(-2.74 to 2.08)         | -0.63(-3.73 to 2.47)             | 0.69    | 0 (Reference)               | NA      |
| PACE                                              | 50.45 (1.49) | 53.55 (1.14)       | 3.1(1 to 5.20)               | 1.9(-1.01 to 4.81)               | 0.20    | 2.53(-0.66 to 5.73)         | 0.12    |
| Control                                           | 51.92 (1.33) | 52.32 (1.26)       | 0.4(-1.59 to 2.39)           | 0 (Reference)                    | NA      | NA                          | NA      |
| <b>SF-12 <sup>b</sup> Physical health T-score</b> |              |                    |                              |                                  |         |                             |         |
| MI                                                | 42.37 (1.43) | 43.48 (1.53)       | 1.11(-1.36 to 3.59)          | 0.39(-3.29 to 4.07)              | 0.83    | 0 (Reference)               | NA      |
| PACE                                              | 40.31 (1.55) | 38.51 (1.6)        | -1.8(-4.36 to 0.76)          | -3.34(-6.93 to 0.24)             | 0.07    | -3.73<br>(-7.34 to -0.12)   | 0.04*   |
| Control                                           | 42.59 (1.27) | 43.22 (1.53)       | 0.63(-1.97 to 3.24)          | 0 (Reference)                    | NA      | NA                          | NA      |
| <b>VascuQoL Score <sup>c</sup></b>                |              |                    |                              |                                  |         |                             |         |
| MI                                                | 5.57 (0.13)  | 5.94 (0.11)        | 0.38(0.19 to 0.57)           | 0.13(-0.13 to 0.4)               | 0.33    | 0 (Reference)               | NA      |
| PACE                                              | 5.21 (0.15)  | 5.53 (0.13)        | 0.32(0.13 to 0.50)           | -0.08(-0.36 to 0.2)              | 0.59    | -0.21(-0.49 to 0.07)        | 0.14    |
| Control                                           | 5.42 (0.13)  | 5.73 (0.13)        | 0.31(0.12 to 0.50)           | 0 (Reference)                    | NA      | NA                          | NA      |
| <b>Activity Score <sup>c</sup></b>                |              |                    |                              |                                  |         |                             |         |
| MI                                                | 5.08 (0.13)  | 5.48 (0.12)        | 0.39(0.16 to 0.62)           | 0.11(-0.22 to 0.45)              | 0.50    | 0 (Reference)               | NA      |
| PACE                                              | 4.87 (0.15)  | 5.26 (0.17)        | 0.40(0.11 to 0.70)           | 0(-0.39 to 0.39)                 | 1.00    | -0.11(-0.5 to 0.27)         | 0.56    |
| Control                                           | 5.17 (0.12)  | 5.4 (0.14)         | 0.24 (-0.02 to 0.49)         | 0 (Reference)                    | NA      | NA                          | NA      |
| <b>Emotion Score <sup>c</sup></b>                 |              |                    |                              |                                  |         |                             |         |
| MI                                                | 6.09 (0.14)  | 6.46 (0.14)        | 0.37 (0.11 to 0.63)          | 0.32(-0.09 to 0.72)              | 0.12    | 0 (Reference)               | NA      |
| PACE                                              | 5.68 (0.17)  | 6.01 (0.19)        | 0.33 (0.01 to 0.65)          | 0.07 (-0.36 to 0.51)             | 0.74    | -0.24(-0.66 to 0.17)        | 0.24    |
| Control                                           | 5.9 (0.15)   | 6.04 (0.18)        | 0.15 (-0.15 to 0.45)         | 0 (Reference)                    | NA      | NA                          | NA      |
| <b>Pain Score <sup>c</sup></b>                    |              |                    |                              |                                  |         |                             |         |

|                                                                                                                                                                                                                                                                                                                                                                                                                                                                                                                                                                                                                                      |             |             |  |                     |                           |       |                      |      |
|--------------------------------------------------------------------------------------------------------------------------------------------------------------------------------------------------------------------------------------------------------------------------------------------------------------------------------------------------------------------------------------------------------------------------------------------------------------------------------------------------------------------------------------------------------------------------------------------------------------------------------------|-------------|-------------|--|---------------------|---------------------------|-------|----------------------|------|
| MI                                                                                                                                                                                                                                                                                                                                                                                                                                                                                                                                                                                                                                   | 5.11 (0.2)  | 5.47 (0.19) |  | 0.36(0.01to 0.70)   | -0.12(-0.61 to 0.37)      | 0.64  | 0 (Reference)        | NA   |
| PACE                                                                                                                                                                                                                                                                                                                                                                                                                                                                                                                                                                                                                                 | 4.48 (0.23) | 4.74 (0.23) |  | 0.26(-0.07 to 0.59) | -0.48<br>(-0.93 to -0.02) | 0.04* | -0.36(-0.84 to 0.12) | 0.14 |
| Control                                                                                                                                                                                                                                                                                                                                                                                                                                                                                                                                                                                                                              | 4.51 (0.21) | 5.23 (0.22) |  | 0.72(0.39 to 1.05)  | 0 (Reference)             | NA    | NA                   | NA   |
| <b>Social Score<sup>c</sup></b>                                                                                                                                                                                                                                                                                                                                                                                                                                                                                                                                                                                                      |             |             |  |                     |                           |       |                      |      |
| MI                                                                                                                                                                                                                                                                                                                                                                                                                                                                                                                                                                                                                                   | 6.1 (0.19)  | 6.56 (0.12) |  | 0.46(0.22 to 0.71)  | 0.3(-0.11 to 0.71)        | 0.15  | 0 (Reference)        | NA   |
| PACE                                                                                                                                                                                                                                                                                                                                                                                                                                                                                                                                                                                                                                 | 5.88 (0.22) | 6.06 (0.19) |  | 0.19(-0.16 to 0.53) | -0.14(-0.59 to 0.31)      | 0.54  | -0.44(-0.9 to 0.02)  | 0.06 |
| Control                                                                                                                                                                                                                                                                                                                                                                                                                                                                                                                                                                                                                              | 6.23 (0.16) | 6.29 (0.17) |  | 0.06(-0.24 to 0.37) | 0 (Reference)             | NA    | NA                   | NA   |
| <b>Symptoms Score<sup>c</sup></b>                                                                                                                                                                                                                                                                                                                                                                                                                                                                                                                                                                                                    |             |             |  |                     |                           |       |                      |      |
| MI                                                                                                                                                                                                                                                                                                                                                                                                                                                                                                                                                                                                                                   | 5.81 (0.13) | 6.08 (0.15) |  | 0.27(0 to 0.53)     | 0.16(-0.2 to 0.52)        | 0.39  | 0 (Reference)        | NA   |
| PACE                                                                                                                                                                                                                                                                                                                                                                                                                                                                                                                                                                                                                                 | 5.42 (0.16) | 5.65 (0.16) |  | 0.23(-0.04 to 0.5)  | -0.04(-0.41 to 0.33)      | 0.83  | -0.2(-0.57 to 0.17)  | 0.29 |
| Control                                                                                                                                                                                                                                                                                                                                                                                                                                                                                                                                                                                                                              | 5.66 (0.14) | 5.83 (0.16) |  | 0.17(-0.07 to 0.42) | 0 (Reference)             | NA    | NA                   | NA   |
| <p>*Significant (p-value &lt; 0.05)</p> <p>Imputed data were used to replace the missing data.</p> <p>Abbreviations: SF-12, Medical Outcomes Study Short-Form Health Survey; VascuQoL, Vascular Quality of Life Scores.</p> <p><sup>a</sup> 6-min walking distance was measured in units of meters.</p> <p><sup>b</sup> SF-12 is used to measure health-related quality of life. The SF-12 is scored on a 0- to 100-point scale in which 0 indicates the most severe limitation and 100 indicates no limitation.</p> <p><sup>c</sup> VascuQoL is scored on the scale from 1 to 7. A higher value indicates better health status.</p> |             |             |  |                     |                           |       |                      |      |
