# Supplementary material for: Efficacy of Community-Based Exercise Therapy Among African American Patients With Peripheral Artery Disease: A Randomized Clinical Trial
Source: PubMed Central journal article supplement (PMC6484888; doi:10.1001/jamanetworkopen.2018.7959), 2019-02-15
Supplement: jamanetwopen-2-e187959-s003.pdf [file jamanetwopen-2-e187959-s003.pdf]

## Data Sharing Statement

Collins. Efficacy of Community-Based Exercise Therapy Among African American Patients With Peripheral Artery Disease. *JAMA Netw Open*. Published February 15, 2019. 10.1001/jamanetworkopen.2018.7959

### Data

**Data available:** Yes

**Data types:** Deidentified participant data

**How to access data:** Data request must be sent to [tcollins2@kumc.edu](mailto:tcollins2@kumc.edu)

**When available:** With publication

### Supporting Documents

**Document types:** None

### Additional Information

**Who can access the data:** Data will be made available to researchers whose proposed use of the data has been approved.

**Types of analyses:** The data will be made available for research purposes that are clearly articulated.

**Mechanisms of data availability:** Data will be made available after approval of a proposal and with a signed data access agreement.
